# Supplementary material for: Effectiveness of AI-delivered Cognitive Behavioral Therapy Interventions for Anxiety and Depressive Symptoms: A Systematic Review
Source: Research Square preprint supplement (doi:10.21203/rs.3.rs-6625905/v1), 2025-05-20
Supplement: Supplementary file 1 [file 95b25a8ccabde3c0d594f054.xlsx]

## Sheet: Anxiety vs Control
Author	Country	Intervention length	Type of RCT	RCT Population	AI CBT Tool(s)	Mode of AI-delivery	Type of Artificial Intelligence (AI) (Personalization)	Type of CBT intervention	Human input?	AI CBT group size (allocated)	Control group	Control group size (allocated)	Anxiety Outcome Measure	Anxiety Results (Intention-to-treat unless otherwise stated)	Anxiety Outcome Measure 2	Anxiety Results 2 (Intention-to-treat unless otherwise stated)	Conclusion (AI CBT vs Control)
Bennion et al., 2020	United Kingdom	Single-session	2-arm RCT	Older adults with emotional distress	MYLO	Online platform/ website	Rule-based AI with free-form text input and keyword-based NLP	Methods of Level Therapy	No human input	59	ELIZA: A text-based AI intervention using Rogerian psychology	53	DASS-21 (Depression, Anxiety, and Stress Scales 21)	Using a per-protocol analysis, there was no statistically significant difference in DASS-21 scores over time between AI CBT and control groups.	NA	NA	No differences in depression, anxiety, and stress reduction between those who completed the AI CBT group and control group.
Bird et al., 2018	United Kingdom	Single-session	2-arm RCT	Undergraduate psychology students	MYLO	Online platform/ website	Rule-based AI with free-form text input and keyword-based NLP	Methods of Level Therapy	No human input	85	ELIZA: A text-based AI intervention using Rogerian psychology	86	DASS-21 (Depression, Anxiety, and Stress Scales 21)	Using a per-protocol analysis, there was no statistically significant difference in DASS-21 scores over time between AI CBT and control groups.	NA	NA	No differences in depression, anxiety, and stress reduction between those who completed the AI CBT group and control group.
Chan et al., 2024	Hong Kong	6 weeks	5-arm RCT	Insomnia patients	dCBTi-chatbot (Talk system in Sleep Sensei)	Mobile app	Rule-based AI and limited keyword-based NLP at fixed nodes	CBTi: sleep restriction, stimulus control, sleep hygiene, psychoeducation about sleep, relaxation, and cognitive therapy	Some conditions had support from a therapist or research assistant	1. dCBTi-therapist (Sleep sensei + therapist): 25 2. dCBTi-assistant (Sleep sensei + assistant): 25 3. dCBTi-chatbot (Sleep sensei): 26	1. dCBTi-unguided (Tools in Sleep Sensei) 2. Sleep hygiene and self-monitoring control	1. dCBTi-unguided (Tools in Sleep Sensei): 21 2. Sleep hygiene and self-monitoring control (dSH): 30	GAD-7 (Generalized Anxiety Disorder-7)	No statistically significant difference in GAD-7 scores between the three AI CBT and unguided CBT (control) groups. No statistically significant difference in GAD-7 scores between AI CBT groups with human support and without human support.	NA	NA	No differences in anxiety reduction between AI CBT and control groups, nor between AI CBT groups with and without human support.	4
Danieli et al., 2022	Italy	8 weeks	4-arm RCT	Older active workers	TEO (Therapy Empowerment Opportunity)	Mobile app	Rule-based AI with free-form text input, keyword-based NLP, and data-driven feedback	CBT Component(s): ABC note writing designed by CBT therapists	Information input in TEO is sent to therapists	1. Group 2 (CBT and Stress Management Training + TEO AI): 16 2. Group 3 (TEO AI only): 14	1. Group 1 (CBT and Stress Management Training only) 2. Group 4 (Wait list control)	1. Group 1 (CBT and Stress Management Training): 16 2. Group 4 (Wait list control): 14	GAD-7 (Generalized Anxiety Disorder-7)	Using a per protocol analysis, there was no reported statistically significant difference in GAD-7 scores between AI CBT and control groups.	SCL-90-R-ANX (Symptom Checklist-90: anxiety subscale)	Using a per protocol analysis, there was no reported statistically significant difference in SCL-90-R anxiety scores between AI CBT and control groups.	No differences in anxiety reduction between AI CBT and control groups.
Fitzsimmons-Craft et al., 2022	United States	8 weeks	2-arm RCT	Young women (aged 18-30) with a high risk of developing an Eating Disorder	Tessa	Instant messenger app (via SMS or Facebook Messenger)	Rule-based AI with free-form text input and keyword-based NLP	CBT for Eating Disorders	No human input	352	No intervention	348	GAD-7 (Generalized Anxiety Disorder-7)	No statistically significant difference in GAD-7 scores over time between AI CBT and control groups.	NA	NA	No differences in anxiety reduction between AI CBT and control groups.
Fulmer et al., 2018	United States	2 or 4 weeks	3-arm RCT	University students	Tess	Instant messenger app	Rule-based AI with free-form text input and predictive machine learning–based NLP	CBT, mindfulness-based therapy, emotionally focused therapy, acceptance and commitment therapy, motivational interviewing, self-compassion therapy, and interpersonal psychotherapy	No human input	1. Use Tess for 2 weeks: 24 2. Use Tess for 4 weeks: 26	Bibliotherapy National Institute of Mental Health “Depression in College Students"	25	GAD-7 (Generalized Anxiety Disorder-7)	Using a completer analysis, AI CBT group had significantly lower GAD-7 scores over time compared to the control group.	NA	NA	The AI CBT intervention was more effective in reducing anxiety among participants who engaged with the intervention, compared to those assigned to the bibliotherapy group.
Hunt et al., 2021	United States United Kingdom	8 weeks	2-arm RCT	IBS patients with no comorbities	Zemedy	Mobile app	Rule-based AI with structured input	CBT for Irritable Bowel Syndrome	No human input	62	Wait list control	59	DASS-21 anxiety subscale (Depression, Anxiety, and Stress Scales 21 -- anxiety subscale)	No statistically significant difference in DASS-21 anxiety subscale scores after treatment between AI CBT and control groups.	NA	NA	No differences in anxiety reduction between AI CBT and control groups.
Jonassaint et al., 2024	United States	12 weeks	2-arm RCT	Sickle cell disease and pain patients	CaRISMA chatbot	Instant messenger app (via Facebook Messenger)	Rule-based AI with structured input	CBT	There is a health coach providing support in both groups.	181	Sickle cell disease and pain education intervention	178	GAD-7 (Generalized Anxiety Disorder-7)	No statistically significant difference in GAD-7 scores over time between AI CBT and control groups.	NA	NA	No differences in anxiety reduction between AI CBT and control groups.
Karkosz et al., 2024	Poland	2 weeks	2-arm RCT	Young adults (aged 18-35)	Fido	Instant messenger app (via Facebook Messenger)	Rule-based AI with close-ended input and predictive machine learning–based NLP	CBT Component(s): ABC technique, cognitive reframing (through Socratic questioning), psychoeducation, gratitude practice	No human input	40	Bibliotherapy Chapters 1-6 and 12 from the Polish translation of “Mind Over Mood”	41	STAI State-Trait Anxiety Inventory	Using a completer analysis, there was no statistically significant difference in STAI scores after treatment and at 1-month follow-up between AI CBT and control groups.	PSWQ (Penn-state worry questionnaire)	No statistically significant difference in PSWQ scores after treatment and at 1-month follow-up between groups.	No differences in anxiety reduction between AI CBT and control groups.
Keinonen et al., 2024	Finland	2 weeks	3-arm RCT	Adolescents with elevated depression symptoms at baseline	1. Youth Compass Plus (+ support from both a psychology student and a virtual coach) 2. Youth Compass (+ support from virtual coach only)	Online platform/website and text message reminders	Rule-based AI with structured input	ACT	Group 1 had a trained psychology student's support Group 2 had no human input	1. Youth Compass Plus (+ support from both a psychology student and a virtual coach): 30 2. Youth Compass (+ support from virtual coach only): 31	No intervention (usual support from school)	29	STAI State-Trait Anxiety Inventory	Using a completer analysis, AI CBT group had significantly lower STAI scores over time compared to the control group, with effect size Cohen’s d=0.66.	NA	NA	The AI CBT intervention was more effective in reducing anxiety among participants who engaged with the intervention, compared to those with no intervention.
Lappalainen et al., 2023	Finland	5 weeks	3-arm RCT	Eighth-grade adolescents	Youth Compass	Online platform/website and text message reminders	Rule-based AI with structured input	ACT	Group 1 had a trained psychology student's support Group 2 had no human input	1. Youth Compass with 45-min call from student coach and virtual coach: 79 2. Youth Compass with virtual coach only and a 15-minute call to explain the technology: 75	No intervention	80	STAI State-Trait Anxiety Inventory	No statistically significant difference in STAI scores over time between AI CBT and control groups. Due to high attrition, the two AI CBT groups were then combined in a per-protocol analysis (30% adherence). The combined AI CBT group had significantly lower STAI scores over time compared to the control group, with effect size Cohen's d = 0.30.	NA	NA	No differences in anxiety reduction between AI CBT and control groups. However, the intervention was more effective for those who completed more than 30% of the AI CBT intervention compared to the control group.
Liu et al., 2022	China	16 weeks	2-arm RCT	University students with depressive symptoms	XiaoNan	Instant messenger app (via WeChat)	Rule-based AI with free-form text input with predictive machine learning–based NLP (possibly deep-learning)	CBT	No human input	41	Bibliotherapy "Change Your Thinking -- Positive and practical ways to overcome stress negative emotions and self-defeating behavior using CBT"	42	GAD-7 (Generalized Anxiety Disorder-7)	The AI CBT group had significantly lower GAD-7 scores after treatment compared to the control group.	NA	NA	The AI CBT intervention was more effective in reducing anxiety compared to bibliotherapy.
Lorenz et al., 2019	Switzerland, Austria and Germany	6 weeks	2-arm RCT	People with subclinical insomnia	mementor somnium	Online platform/ website	Rule-based AI with structured input and data-driven feedback	CBTi	No human input	29	Wait list control	27	BSI-18 A (Brief Symptom Inventory 18 anxiety subscale)	No statistically significant difference in BSI-18 anxiety subscale scores after treatment between AI CBT and control groups.	NA	NA	No differences in anxiety reduction between AI CBT and control groups.
Sabour et al., 2023	China	3 weeks	3-arm RCT	General population	1. Emohaa CBT-Bot 2. Emohaa Full-Bot	Mobile app	1. Emohaa CBT-Bot: Rule-based AI with structured input and data-driven feedback 2. Emohaa Full-Bot: Generative AI with free-form text input and deep learning-based NLP + Emohaa CBT-bot	CBT Component(s): automatic thoughts training/ cognitive reframing	No human input	1. Emohaa Full-Bot: 70 2. Emohaa CBT-Bot: 72	Wait list control	105	GAD-7 (Generalized Anxiety Disorder-7)	No statistically significant difference in GAD-7 scores over time between AI CBT and control groups. Using a per protocol analysis, a statistically significant difference in GAD-7 scores after treatment was observed between both AI CBT groups and the control group. No statistically significant difference in anxiety reduction between Emohaa Full and CBT-Bot across all analyses.	NA	NA	No differences in anxiety reduction between AI CBT and control groups. However, the intervention was more effective for those who completed the AI CBT intervention in reducing anxiety compared to the control group. No differences in anxiety reduction between individual AI groups.

## Sheet: Depression vs Control
Author	Country	Intervention length	Type of RCT	RCT Population	AI CBT Tool(s)	Mode of AI-delivery	Type of Artificial Intelligence (AI) (Personalization)	Type of CBT intervention	Human input?	AI CBT group size (allocated)	Control group	Control group size (allocated)	Depression Outcome Measure	Depression Results (Intention-to-treat unless otherwise stated)	Depression Outcome Measure 2	Depression Results (Intention-to-treat unless otherwise stated)	Conclusion
Bennion et al., 2020	United Kingdom	Single-session	2-arm RCT	Older adults with emotional distress	MYLO	Online platform/ website	Rule-based AI with free-form text input and keyword-based NLP	Methods of Level Therapy	No human input	59	ELIZA: A text-based AI intervention using Rogerian psychology	53	DASS-21 (Depression, Anxiety, and Stress Scales 21)	Using a per-protocol analysis, there was no statistically significant difference in DASS-21 scores over time between AI CBT and control groups.	NA	NA	No differences in depression, anxiety, and stress reduction between those who completed the AI CBT group and control group.
Bird et al., 2018	United Kingdom	Single-session	2-arm RCT	Undergraduate psychology students	MYLO	Online platform/ website	Rule-based AI with free-form text input and keyword-based NLP	Methods of Level Therapy	No human input	85	ELIZA: A text-based AI intervention using Rogerian psychology	86	DASS-21 (Depression, Anxiety, and Stress Scales 21)	Using a per-protocol analysis, there was no statistically significant difference in DASS-21 scores over time between AI CBT and control groups.	NA	NA	No differences in depression, anxiety, and stress reduction between those who completed the AI CBT group and control group.
Chan et al., 2024	Hong Kong	6 weeks	5-arm RCT	Insomnia patients	dCBTi-chatbot (Talk system in Sleep Sensei)	Mobile app	Rule-based AI and limited keyword-based NLP at fixed nodes	CBTi: sleep restriction, stimulus control, sleep hygiene, psychoeducation about sleep, relaxation, and cognitive therapy	Some conditions had support from a therapist or research assistant	1. dCBTi-therapist (Sleep sensei + therapist): 25 2. dCBTi-assistant (Sleep sensei + assistant): 25 3. dCBTi-chatbot (Sleep sensei): 26	1. dCBTi-unguided (Tools in Sleep Sensei) 2. Sleep hygiene and self-monitoring control	1. dCBTi-unguided (Tools in Sleep Sensei): 21 2. Sleep hygiene and self-monitoring control (dSH): 30	PHQ-9 (Patient Health Questionnaire-9)	No statistically significant difference in PHQ-9 scores between the three AI CBT and unguided CBT (control) groups. No statistically significant difference in PHQ-9 scores between AI CBT groups with human support and without human support.	NA	NA	No differences in reduction of depressive symptoms between AI CBT and control groups, nor between AI CBT groups with and without human support.			4
Danieli et al., 2022	Italy	8 weeks	4-arm RCT	Older active workers	TEO (Therapy Empowerment Opportunity)	Mobile app	Rule-based AI with free-form text input, keyword-based NLP, and data-driven feedback	CBT Component(s): ABC note writing designed by CBT therapists	Information input in TEO is sent to therapists	1. Group 2 (CBT and Stress Management Training + TEO AI): 16 2. Group 3 (TEO AI only): 14	1. Group 1 (CBT and Stress Management Training only) 2. Group 4 (Wait list control)	1. Group 1 (CBT and Stress Management Training): 16 2. Group 4 (Wait list control): 14	PHQ-8 (Patient Health Questionnaire-8)	Using a per protocol analysis, there was no reported statistically significant difference in PHQ-9 scores between AI CBT and control groups.	SCL-90-R D (Symptom Checklist-90: depression subscale)	Using a per protocol analysis, there was no reported statistically significant difference in SCL-90-R scores between AI CBT and control groups.	No differences in depressive symptom reduction between AI CBT and control groups.
Fitzsimmons-Craft et al., 2022	United States	8 weeks	2-arm RCT	Young women (aged 18-30) with a high risk of developing an Eating Disorder	Tessa	Instant messenger app (via SMS or Facebook Messenger)	Rule-based AI with free-form text input and keyword-based NLP	CBT for Eating Disorders	No human input	352	No intervention	348	PHQ-8 (Patient Health Questionnaire-8)	No statistically significant difference in PHQ-9 scores over time between AI CBT and control groups.	NA	NA	No differences in depressive symptom reduction between AI CBT and control groups.
Fulmer et al., 2018	United States	2 or 4 weeks	3-arm RCT	University students	Tess	Instant messenger app	Rule-based AI with free-form text input and predictive machine learning–based NLP	CBT, mindfulness-based therapy, emotionally focused therapy, acceptance and commitment therapy, motivational interviewing, self-compassion therapy, and interpersonal psychotherapy	No human input	1. Use Tess for 2 weeks: 24 2. Use Tess for 4 weeks: 26	Bibliotherapy National Institute of Mental Health “Depression in College Students"	25	PHQ-9 (Patient Health Questionnaire-9)	Using a completer analysis, a statistically significant difference in PHQ-9 scores was found between the control group and the AI CBT group which had unlimited access to Tess for 2 weeks.	NA	NA	The AI CBT intervention was more effective in reducing depressive symptoms among participants who engaged with the intervention, compared to those assigned to the bibliotherapy group.
He et al., 2022	China	1 week	3-arm RCT (1:1:1)	College students	XiaoE	Instant messenger app (via WeChat)	Rule-based AI with free-form text input, deep learning–based NLP, and data-driven feedback	CBT	No human input	49	1. Bibliotherapy "I Had a Black Dog" 2. Xiaoai: A general chatbot using Generative AI	1. Bibliotherapy "I Had a Black Dog": 49 2. Xiaoai: A general chatbot using Generative AI: 50	PHQ-9 (Patient Health Questionnaire-9)	AI CBT group had significantly lower PHQ-9 scores compared to both control groups after treatment with effect size Cohen’s d=0.51, and 30-day follow-up with effect size Cohen's d=0.31.	NA	NA	The AI CBT intervention was more effective in reducing depressive symptoms compared to those assigned to the bibliotherapy group and general chatbot Xiaoai, with moderate effect size after treatment and small effect size at 30-day follow-up.
Hunt et al., 2021	United States United Kingdom	8 weeks	2-arm RCT	IBS patients with no comorbities	Zemedy	Mobile app	Rule-based AI with structured input	CBT for Irritable Bowel Syndrome	No human input	62	Wait list control	59	PHQ-9 (Patient Health Questionnaire-9)	No statistically significant difference in PHQ-9 scores over time between AI CBT and control groups. Using a completer analysis, the AI CBT group had significantly lower PHQ-9 scores compared to control group after treatment with large effect size Cohen’s d=1.07. Control group was given the AI CBT intervention after 8 weeks, but no significant change could be seen between two time points.	DASS (Depression Anxiety Stress Scale: depression subscale)	No statistically significant difference in DASS anxiety subscale scores over time between AI CBT and control groups. Using a completer analysis, the AI CBT group had significantly lower DASS anxiety subscale scores compared to control group after treatment with large effect size Cohen’s d=0.83. The control group was given the AI CBT intervention after 8 weeks, but no significant change could be s…	No differences in depressive symptom reduction between AI CBT and wait list control group. However, the intervention was more effective for those who completed the AI CBT intervention compared to the wait list control group.
Jonassaint et al., 2024	United States	12 weeks	2-arm RCT	Sickle cell disease and pain patients	CaRISMA chatbot	Instant messenger app (via Facebook Messenger)	Rule-based AI with structured input	CBT	There is a health coach providing support in both groups.	181	Sickle cell disease and pain education intervention	178	PHQ-8/9 (Patient Health Questionnaire-8/9)	No statistically significant difference in PHQ-8/9 scores over time between AI CBT and control groups.	NA	NA	No differences in depressive symptom reduction between AI CBT and control groups.
Karkosz et al., 2024	Poland	2 weeks	2-arm RCT	Young adults (aged 18-35)	Fido	Instant messenger app (via Facebook Messenger)	Rule-based AI with close-ended input and predictive machine learning–based NLP	CBT Component(s): ABC technique, cognitive reframing (through Socratic questioning), psychoeducation, gratitude practice	No human input	40	Bibliotherapy Chapters 1-6 and 12 from the Polish translation of “Mind Over Mood”	41	PHQ-9 (Patient Health Questionnaire-9)	No statistically significant difference in PHQ-9 scores between AI CBT and control groups after treatment and at 1-month follow-up.	NA	NA	No differences in depressive symptom reduction between AI CBT and control groups.
Keinonen et al., 2024	Finland	2 weeks	3-arm RCT	Adolescents with elevated depression symptoms at baseline	1. Youth Compass Plus (+ support from both a psychology student and a virtual coach) 2. Youth Compass (+ support from virtual coach only)	Online platform/website and text message reminders	Rule-based AI with structured input	ACT	Group 1 had a trained psychology student's support Group 2 had no human input	1. Youth Compass Plus (+ support from both a psychology student and a virtual coach): 30 2. Youth Compass (+ support from virtual coach only): 31	No intervention (Usual support from school)	29	DEPS (Depression scale)	Using a completer analysis, the AI CBT groups had significantly lower DEPS scores over time compared to the control group, with a moderate effect size Cohen's d=0.70.	NA	NA	The AI CBT intervention was more effective in reducing depressive symptoms compared to no intervention, with a moderate effect size.
Lappalainen et al., 2023	Finland	5 weeks	3-arm RCT	Eighth-grade adolescents	Youth Compass	Online platform/website and text message reminders	Rule-based AI with structured input	ACT	Group 1 had a trained psychology student's support Group 2 had no human input	1. Youth Compass with 45-min call from student coach and virtual coach: 79 2. Youth Compass with virtual coach only and a 15-minute call to explain the technology: 75	No intervention	80	DEPS (Depression scale)	No statistically significant difference in DEPS scores over time between AI CBT and control groups.	NA	NA	No differences in depressive symptom reduction between AI CBT and control groups.
Liu et al., 2022	China	16 weeks	2-arm RCT	University students with depressive symptoms	XiaoNan	Instant messenger app (via WeChat)	Rule-based AI with free-form text input with predictive machine learning–based NLP (possibly deep-learning)	CBT	No human input	41	Bibliotherapy "Change Your Thinking -- Positive and practical ways to overcome stress negative emotions and self-defeating behavior using CBT"	42	PHQ-9 (Patient Health Questionnaire-9)	The AI CBT groups had significantly lower PHQ-9 scores after treatment compared to the control group, with a large effect size Cohen's d=0.83. A completer analysis showed that the AI group significantly reduced their depression over time compared to the control group, and such difference was found in the first 4 weeks already.	NA	NA	The AI CBT intervention was more effective in reducing depressive symptoms compared to bibliotherapy, with a large effect size.
Lorenz et al., 2019	Switzerland, Austria and Germany	6 weeks	2-arm RCT	People with subclinical insomnia	mementor somnium	Online platform/ website	Rule-based AI with structured input and data-driven feedback	CBTi	No human input	29	Wait list control	27	BDI-II (Beck Depression Inventory-II)	The AI CBT groups had significantly lower PHQ-9 scores over time compared to the control group, with a large effect size Cohen's d= 1.19.	NA	NA	The AI CBT intervention was more effective in reducing depressive symptoms compared to wait list control, with a large effect size.
Sabour et al., 2023	China	3 weeks	3-arm RCT	General population	1. Emohaa CBT-Bot 2. Emohaa Full-Bot	Mobile app	1. Emohaa CBT-Bot: Rule-based AI with structured input and data-driven feedback 2. Emohaa Full-Bot: Generative AI with free-form text input and deep learning-based NLP + Emohaa CBT-bot	CBT Component(s): automatic thoughts training/ cognitive reframing	No human input	1. Emohaa Full-Bot: 70 2. Emohaa CBT-Bot: 72	Wait list control	105	PHQ-9 (Patient Health Questionnaire-9)	There is a statistically significant difference in PHQ-9 scores over time between AI CBT and control groups. Using a per protocol analysis, a statistically significant difference in PHQ-9 scores after treatment was observed between both AI CBT groups and the control group. No statistically significant difference in depressive symptom reduction between Emohaa Full and CBT-Bot across all analyses.	NA	NA	The AI CBT intervention was more effective in reducing depressive symptoms compared to wait list control. The AI CBT intervention was also more effective in reducing depression for those who completed the AI CBT intervention compared to the control group. No differences in depressive symptom reduction between individual AI groups.
Six et al., 2025	United States	2 weeks	4-arm RCT	College students	AirHeart	Mobile app	Conversational component: Rule-based AI with free-form voice input using machine-learning based voice-recognition and neural text-to-speech	CBT	No human input	1. Conversational component, Animation component, and CBT: around 52-53 2. Conversational component and CBT: around 52-53	1. Animation component and CBT 2. CBT only	1. Animation component and CBT: around 52-53 2. CBT only: around 52-54	PHQ-8 (Patient Health Questionnaire-8)	Using a completer analysis, there were no significant difference between AI CBT and control groups.	NA	NA	No differences in depressive symptom reduction between AI CBT and control groups.

## Sheet: Quality Assessment
Study	Domain 1: Risk of bias arising from the randomization process	Domain 2: Risk of bias due to deviations from the intended interventions (effect of assignment to intervention)	Domain 2: Risk of bias due to deviations from the intended interventions (effect of adhering to intervention)	Domain 3: Risk of bias due to missing outcome data	Domain 4: Risk of bias in measurement of the outcome	Domain 5: Risk of bias in selection of the reported result	Overall risk-of-bias
Bennion et al., 2020	Some concerns	Part 1: Low risk Part 2: High risk	High risk	High risk	Low risk	Some concerns	High risk
Bird et al., 2018	Some concerns	Part 1: Low risk Part 2: High risk	High risk	Low risk	Low risk	High risk	High risk
Chan et al., 2024	Low risk	Part 1: Low risk Part 2: Low risk	Some concerns	Low risk	Low risk	Low risk	Some concerns
Danieli et al., 2022	High risk	Part 1: Low risk Part 2: High risk	High risk	Some concerns	Low risk	Low risk	High risk
Fitzsimmons-Craft et al., 2022	Low risk	Part 1: Low risk Part 2: Low risk	Some concerns	Low risk	Low risk	Low risk	Some concerns
Fulmer et al., 2018	Low risk	Part 1: Low risk Part 2: Some concerns	Low risk	Low risk	Low risk	Low risk	Some concerns
He et al., 2022	Low risk	Part 1: Low risk Part 2: Low risk	Some concerns	Low risk	Low risk	Low risk	Some concerns
Hunt et al., 2021	Some concerns	Part 1: Low risk Part 2: Low risk	Some concerns	Low risk	Low risk	Low risk	Some concerns
Jonassaint et al., 2024	Low risk	Part 1: Low risk Part 2: Low risk	Some concerns	High risk	Low risk	Low risk	High risk
Karkosz et al., 2024	High risk	Part 1: Low risk Part 2: High risk	High risk	High risk	Low risk	Low risk	High risk
Keinonen et al., 2024	Some concerns	Part 1: Some concerns Part 2: High risk	High risk	High risk	Low risk	Some concerns	High risk
Lappalainen et al., 2023	Low risk	Part 1: High risk Part 2: Low risk	High risk	High risk	Low risk	Low risk	High risk
Liu et al., 2022	Some concerns	Part 1: Low risk Part 2: Low risk	Some concerns	Low risk	Low risk	Some concerns	Some concerns
Lorenz et al., 2019	Some concerns	Part 1: Low risk Part 2: Low risk	Some concerns	Low risk	Low risk	Low risk	Some concerns
Sabour et al., 2023	Low risk	Part 1: Low risk Part 2: Low risk	Low risk	Low risk	Low risk	Some concerns	Some concerns
Six et al., 2025	Some concerns	Part 1: Low risk Part 2: High risk	High risk	High risk	Low risk	Low risk	High risk
